# Supplementary material for: Biosurfactants from marine bacteria to control anthracnose in Mango Fruits
Source: Research Square preprint supplement (doi:10.21203/rs.3.rs-2419275/v1), 2023-01-03

Supporting information: Antifungal Compounds from Marine Bacteria to Control Anthracnose in Mango Fruits

Laura C. Holguín-Sterling1,2, Alberto R. Páez2, Albert D. Patiño1, Javier Gómez-León1, Lina M. Blandón1*

1. *Marine Bioprospecting Line, Instituto de Investigaciones Marinas y Costeras “José Benito Vives de Andréis”- INVEMAR; Santa Marta D.T.C.H, Colombia*
2. *Tropical Phytotechniques research group, Universidad del Magdalena; Santa Marta D.T.C.H, Colombia*

*Corresponding author:Dr. Lina Marcela Blandón

Marine and Coastal Research Institute “José Benito Vives de Andréis”- INVEMAR, Calle 25 No. 2-55, Playa Salguero, Santa Marta D.T.C.H., Colombia.

E-mail: [lmblando@unal.edu.co](mailto:lmblando@unal.edu.co), [lina.blandon@invemar.org.co](mailto:lina.blandon@invemar.org.co)

**Table S1.** Marine bacteria evaluated regarding their antifungal activity against *Colletotrichum* species. * Marine Museum of Natural History of Colombia–Makuriwa

| **Bacteria** | **Number MHNMC Catalogue*** | **GenBank Code** |
| --- | --- | --- |
| *Bacillus safensis* | INV FIR26 | MG271959 |
| *Bacillus velezensis* | INV FIR 31 | MG271962 |
| *Bacillus* sp. | INV FIR35 | MG271968 |
| *Bacillus* sp. | INV FIR48 | MK129309 |
| *Pseudoalteromonas*sp. | INV PRT33 | MK129336 |
| *Micromonospora*sp. | INV ACT5 | MK129361 |

Table S2. *Species* of Colletotrichum isolated from flowers and fruits of mango and GenBank accession.

| **Fungus** | **Accession Number in GenBank** | | | | |
| --- | --- | --- | --- | --- | --- |
| **ITS** | **GAPDH** | **TUB2** | **CHS-1** | **ACT** |
| *C. tropicale* | MT96570 | ON050980 | ON081053 | ON050972 | ON164646 |
| *C. gloeosporioides* | MT965709 | ON050981 | ON081054 | ON050973 | ON164647 |
| *C. asianum* | MT965710 | ON050982 | ON081055 | ON050974 | ON185927 |
| *C. tropicale* | MT965711 | ON050983 | ON081056 | ON050975 | ON185928 |
| *C. Karstii* | MT965712 | ON050984 | ON081061 | ON050976 | ON262101 |
| *C. tropicale* | MT965714 | ON050985 | ON081057 | ON050977 | ON262102 |
| *C. asianum* | MT965713 | ON050986 | ON081058 | ON050978 | ON262103 |
| *C. asianum* | ON262105 | ON050987 | ON081059 | ON050979 | ON262104 |

**Figure S1.** Antifungal screening in PDA plates of marine bacterium *Bacillus velezensis* INV FIR31 against four species of the phytopathogenic fungus *Colletotrichum spp.*


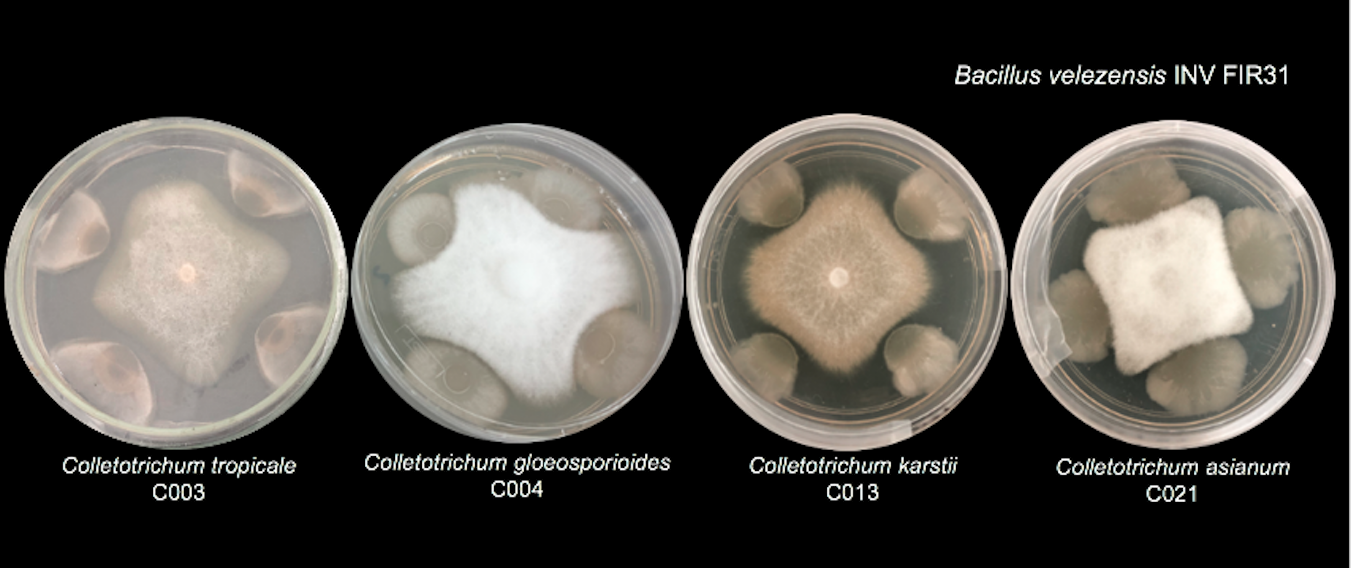


**Figure S2.** Anthracnose development in mango fruits of the Hilaza variety inoculated with four species of *Colletotrichum* and subjected to treatments with dimethyl sulfoxide (DMSO 1%) and the extract from bacterium *Bacillus Velezensis* INV FIR31 (BS57) at a concentration of 400 ppm.


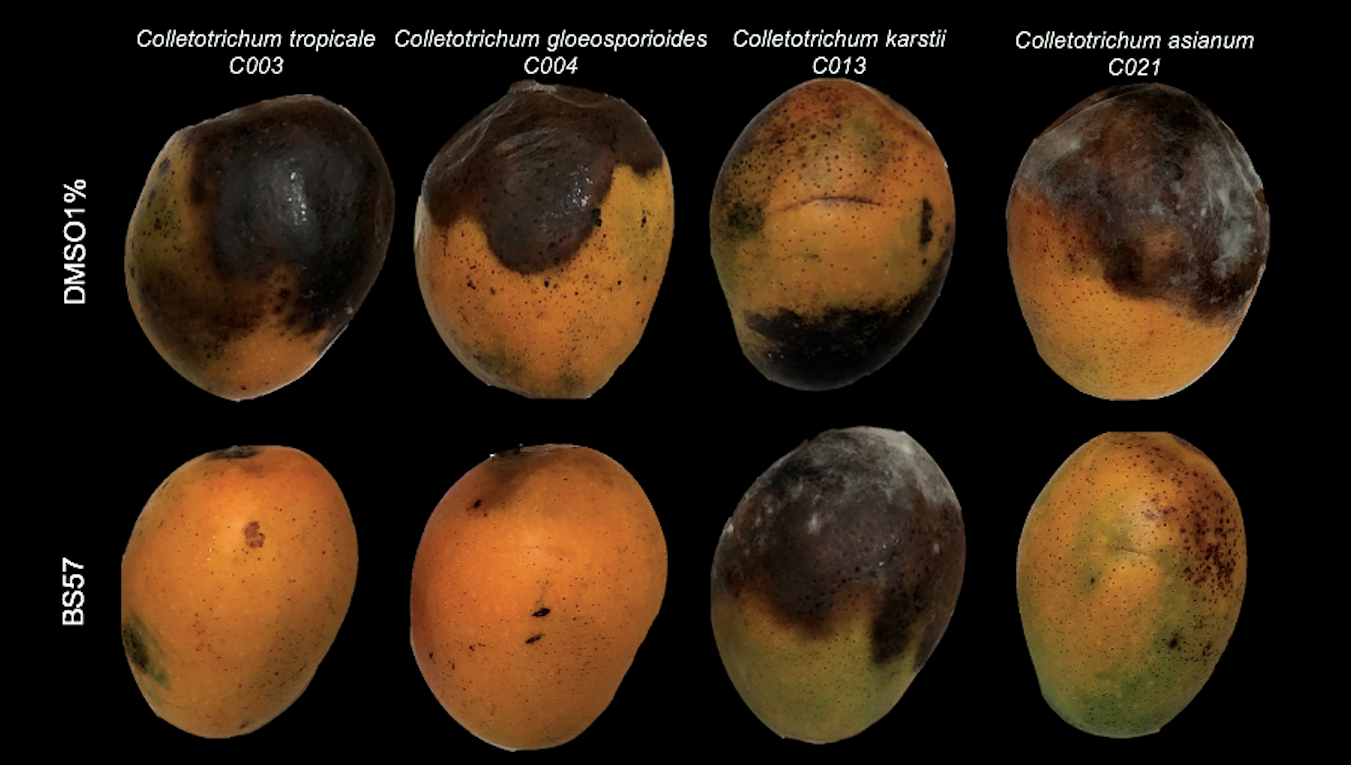

Supplement: Supplementary file 1 [file bd0445591417176498e21284.docx]
